# Supplementary material
Source: publisher figshare collection journal article supplement (https://wiley.figshare.com/articles/dataset/_/3564222)
Supplement: Supplementary file 1 [file 1]

## Appendix B

TABLE B1. Live tree diameter size class distributions by forest structural class and type in Oregon, Washington, and inland Northern California.

|       |      | Live Trees/ha |          |          |          |           |            |         |
|-------|------|---------------|----------|----------|----------|-----------|------------|---------|
| Class | Type | <10 cm        | 10-25 cm | 25-50 cm | 50-75 cm | 75-100 cm | 100-150 cm | >150 cm |
| 1     |      | 19±116        | -        | -        | -        | -         | -          | -       |
|       | 1.1  | 47±186        | -        | -        | -        | -         | -          | -       |
|       | 1.2  | 4±44          | -        | -        | -        | -         | -          | -       |
| 2     |      | 71±146        | 71±87    | 23±27    | 1±3      | 0±1       | -          | -       |
|       | 2.1  | 55±117        | 87±93    | 31±29    | 2±4      | 0±1       | -          | -       |
|       | 2.2  | 104±190       | 36±55    | 6±10     | 0±1      | -         | -          | -       |
| 3     | 3.0  | 637±540       | 265±241  | 20±32    | 1±3      | 0±1       | -          | -       |
| 4     | 4.0  | 35±92         | 73±79    | 71±58    | 14±16    | 2±5       | 0±1        | -       |
| 5     |      | 419±515       | 278±257  | 80±74    | 6±14     | 1±3       | 0±1        | -       |
|       | 5.1  | 723±611       | 344±287  | 45±48    | 3±7      | 1±2       | -          | -       |
|       | 5.2  | 153±248       | 165±147  | 66±46    | 4±7      | 1±2       | -          | -       |
|       | 5.3  | 422±462       | 350±281  | 136±93   | 13±21    | 2±4       | 0±1        | -       |
| 6     |      | 98±227        | 143±141  | 97±70    | 17±19    | 3±5       | 1±2        | -       |
|       | 6.1  | 86±166        | 149±127  | 105±68   | 18±20    | 3±5       | 1±2        | -       |
|       | 6.2  | 181±461       | 97±212   | 40±57    | 8±12     | 2±4       | 1±2        | 0±1     |
| 7     |      | 1,299±1,447   | 502±409  | 115±91   | 8±13     | 1±3       | 0±1        | -       |
|       | 7.1  | 337±313       | 344±202  | 145±90   | 10±13    | 1±3       | 0±1        | -       |
|       | 7.2  | 1,297±766     | 623±386  | 126±84   | 10±15    | 2±4       | 1±2        | -       |
|       | 7.3  | 3,032±1,753   | 620±584  | 46±58    | 2±8      | 1±2       | 0±1        | -       |
| 8     |      | 175±284       | 195±182  | 173±108  | 34±35    | 6±9       | 2±4        | 0±1     |
|       | 8.1  | 191±260       | 220±175  | 184±104  | 26±24    | 3±5       | 1±2        | -       |
|       | 8.2  | 234±365       | 234±212  | 190±115  | 23±25    | 3±6       | 1±3        | 0±1     |

|    |      |            |         |         |       |       |       |     |
|----|------|------------|---------|---------|-------|-------|-------|-----|
|    | 8.3  | 78±155     | 109±112 | 134±96  | 62±46 | 12±12 | 4±6   | 0±1 |
| 9  |      | 1,017±1024 | 517±378 | 189±121 | 26±28 | 5±8   | 2±4   | 0±1 |
|    | 9.1  | 928±1022   | 456±326 | 154±102 | 14±17 | 2±4   | 1±2   | -   |
|    | 9.2  | 792±794    | 476±335 | 212±122 | 37±32 | 8±9   | 3±5   | 0±1 |
|    | 9.3  | 1,736±1208 | 724±480 | 194±135 | 20±24 | 4±7   | 2±4   | 0±1 |
| 10 |      | 301±415    | 258±215 | 190±123 | 52±41 | 13±15 | 5±8   | 0±2 |
|    | 10.1 | 281±419    | 241±204 | 190±122 | 44±34 | 9±10  | 3±5   | 0±1 |
|    | 10.2 | 297±369    | 278±227 | 188±124 | 51±39 | 14±17 | 6±8   | 0±2 |
|    | 10.3 | 362±517    | 238±196 | 195±124 | 76±52 | 18±14 | 10±11 | 1±2 |
| 11 |      | 257±417    | 164±182 | 113±88  | 70±57 | 25±18 | 16±13 | 2±4 |
|    | 11.1 | 377±497    | 212±212 | 128±100 | 67±56 | 23±18 | 16±12 | 3±4 |
|    | 11.2 | 95±174     | 99±99   | 93±64   | 75±59 | 27±17 | 15±15 | 2±4 |

TABLE B2. Snag diameter size class distributions by forest structural class and type in Oregon, Washington, and inland Northern California.

|       |      | Snags/ha |          |          |           |         |
|-------|------|----------|----------|----------|-----------|---------|
| Class | Type | 12-25 cm | 25-50 cm | 50-75 cm | 75-100 cm | >100 cm |
| 1     |      | 78±153   | 43±69    | 6±14     | 1±3       | 1±3     |
|       | 1.1  | 215±198  | 111±79   | 14±20    | 2±4       | 1±5     |
|       | 1.2  | 7±19     | 8±16     | 1±4      | 0±1       | 0±1     |
| 2     |      | 5±24     | 2±11     | 0±3      | 0±1       | -       |
|       | 2.1  | 2±7      | 1±4      | 0±1      | -         | -       |
|       | 2.2  | 12±41    | 5±18     | 1±5      | 0±2       | 0±1     |
| 3     | 3.0  | 7±14     | 4±10     | 1±4      | 0±2       | 0±1     |
| 4     | 4.0  | 4±10     | 2±6      | 1±3      | 0±1       | -       |
| 5     |      | 15±31    | 5±12     | 1±4      | 0±1       | 0±1     |
|       | 5.1  | 1±7      | 0±3      | 0±1      | -         | -       |
|       | 5.2  | 15±22    | 5±10     | 1±4      | 0±1       | 0±1     |
|       | 5.3  | 29±48    | 10±18    | 2±6      | 0±1       | 0±1     |
| 6     |      | 71±117   | 36±59    | 7±15     | 1±4       | 1±2     |
|       | 6.1  | 45±57    | 22±26    | 4±8      | 1±3       | 0±2     |
|       | 6.2  | 251±224  | 132±110  | 24±33    | 4±8       | 2±5     |
| 7     |      | 14±21    | 4±9      | 1±3      | 0±1       | 0±1     |
|       | 7.1  | 11±19    | 4±8      | 1±3      | 0±1       | -       |
|       | 7.2  | 19±22    | 6±10     | 1±4      | 0±1       | 0±1     |
|       | 7.3  | 11±20    | 3±8      | 1±4      | 0±1       | 0±1     |
| 8     |      | 17±25    | 8±16     | 2±6      | 1±2       | 1±2     |
|       | 8.1  | 15±19    | 5±9      | 1±4      | 0±1       | 0±1     |
|       | 8.2  | 22±32    | 12±23    | 3±8      | 1±3       | 1±2     |
|       | 8.3  | 15±22    | 7±13     | 2±6      | 1±2       | 1±2     |

|    |      |        |       |       |     |     |
|----|------|--------|-------|-------|-----|-----|
| 9  |      | 53±63  | 20±30 | 4±8   | 1±2 | 1±2 |
|    | 9.1  | 65±52  | 27±26 | 4±8   | 1±2 | 0±1 |
|    | 9.2  | 30±31  | 10±15 | 3±7   | 1±2 | 0±1 |
|    | 9.3  | 88±106 | 36±49 | 7±12  | 2±4 | 1±2 |
| 10 |      | 69±81  | 36±39 | 10±16 | 3±5 | 2±3 |
|    | 10.1 | 94±97  | 52±47 | 12±21 | 3±5 | 1±3 |
|    | 10.2 | 45±54  | 20±24 | 6±10  | 2±4 | 1±2 |
|    | 10.3 | 86±84  | 47±38 | 14±18 | 5±7 | 4±5 |
| 11 |      | 29±42  | 23±25 | 11±16 | 5±6 | 4±5 |
|    | 11.1 | 34±49  | 26±28 | 14±18 | 7±7 | 6±6 |
|    | 11.2 | 23±29  | 20±21 | 6±10  | 3±4 | 3±4 |

TABLE B3. Diameter class distribution of biomass of dead and downed wood  $\geq 12$  cm at the large end and  $\geq 3$  m long by forest structural class and type in Oregon, Washington, and inland Northern California.

|       |      | Biomass of Dead and Downed Wood (Mg/ha) |           |           |           |           |
|-------|------|-----------------------------------------|-----------|-----------|-----------|-----------|
| Class | Type | 12-25 cm                                | 25-50 cm  | 50-75 cm  | 75-100 cm | >100 cm   |
| 1     |      | 5.0±6.0                                 | 8.5±10.8  | 3.0±6.3   | 1.8±6.2   | 0.9±8.0   |
|       | 1.1  | 5.3±6.7                                 | 10.1±12.6 | 2.4±5.6   | 1.4±7.0   | 1.2±11.9  |
|       | 1.2  | 4.8±5.5                                 | 7.6±9.6   | 3.3±6.6   | 2.0±5.7   | 0.8±4.9   |
| 2     |      | 1.1±2.9                                 | 1.5±3.7   | 0.9±3.8   | 0.5±3.8   | 0.5±3.8   |
|       | 2.1  | 0.1±1.6                                 | 0.8±2.1   | 0.6±2.6   | 0.2±1.8   | 0.1±1.2   |
|       | 2.2  | 2.3±4.3                                 | 3.1±5.6   | 1.6±5.5   | 1.2±6.3   | 0.3±2.3   |
| 3     | 3.0  | 3.7±4.4                                 | 6.4±12.8  | 6.9±12.8  | 5.5±11.9  | 5.4±18.8  |
| 4     | 4.0  | 1.6±3.6                                 | 2.3±4.0   | 1.6±4.5   | 1.2±5.8   | 0.6±4.7   |
| 5     |      | 2.1±4.1                                 | 3.1±5.2   | 1.8±4.4   | 1.0±4.7   | 0.3±2.7   |
|       | 5.1  | 1.8±3.1                                 | 2.3±3.5   | 1.1±3.2   | 0.8±3.8   | 0.1±0.7   |
|       | 5.2  | 1.6±2.4                                 | 2.8±4.4   | 1.4±3.4   | 0.6±2.9   | 0.1±1.7   |
|       | 5.3  | 3.1±6.1                                 | 4.5±7.1   | 2.9±6.1   | 1.8±6.9   | 0.6±4.4   |
| 6     |      | 3.1±4.2                                 | 5.7±6.4   | 2.5±5.2   | 1.4±4.8   | 0.6±3.5   |
|       | 6.1  | 2.7±3.2                                 | 4.8±5.3   | 2.3±4.4   | 1.2±4.3   | 0.6±3.3   |
|       | 6.2  | 6.3±7.8                                 | 11.5±9.5  | 3.8±8.6   | 2.6±7.3   | 0.8±4.6   |
| 7     |      | 2.3±3.1                                 | 3.9±5.2   | 2.3±4.6   | 1.2±4.3   | 0.5±3.3   |
|       | 7.1  | 1.6±2.1                                 | 2.5±3.2   | 1.6±3.5   | 0.7±3.2   | 0.3±2.6   |
|       | 7.2  | 2.6±3.4                                 | 4.9±5.9   | 3.0±5.3   | 1.6±5.0   | 0.7±3.8   |
|       | 7.3  | 3.2±3.8                                 | 4.9±6.5   | 2.6±5.1   | 1.6±5.0   | 0.6±3.6   |
| 8     |      | 2.9±3.7                                 | 7.1±8.8   | 7.3±11.8  | 6.3±17.8  | 5.6±17.4  |
|       | 8.1  | 2.1±2.3                                 | 3.8±4.5   | 2.3±4.2   | 1.2±4.2   | 0.4±3.3   |
|       | 8.2  | 4.7±5.1                                 | 12.9±11.4 | 15.9±15.6 | 15.6±27.9 | 15.7±27.4 |

|    |      |         |           |           |           |           |
|----|------|---------|-----------|-----------|-----------|-----------|
|    | 8.3  | 2.2±2.5 | 5.2±6.5   | 4.8±8.1   | 3.1±7.6   | 1.5±6.0   |
| 9  |      | 3.6±4.8 | 7.0±8.3   | 4.6±9.1   | 2.8±8.3   | 2.6±11.7  |
|    | 9.1  | 5.5±6.5 | 8.5±8.2   | 3.3±5.5   | 1.9±5.8   | 0.9±4.7   |
|    | 9.2  | 1.8±2.0 | 3.9±4.3   | 2.6±4.6   | 1.1±3.5   | 0.5±3.3   |
|    | 9.3  | 4.7±4.7 | 12.5±11.9 | 11.7±16.3 | 9.0±14.6  | 11.0±23.7 |
| 10 |      | 4.0±4.4 | 10.4±10.2 | 7.2±10.4  | 4.5±9.6   | 3.1±12.0  |
|    | 10.1 | 5.1±5.3 | 12.7±11.8 | 7.1±9.6   | 3.5±8.4   | 2.4±9.0   |
|    | 10.2 | 3.3±3.7 | 8.5±7.9   | 6.2±8.5   | 4.6±9.0   | 2.3±8.0   |
|    | 10.3 | 3.7±3.2 | 11.1±11.2 | 10.8±15.4 | 6.7±12.9  | 7.0±22.6  |
| 11 |      | 2.8±3.0 | 13.4±10.5 | 17.2±16.8 | 15.1±19.3 | 18.2±37.4 |
|    | 11.1 | 3.2±3.3 | 16.4±11.2 | 23.2±18.2 | 20.2±21.0 | 27.0±45.8 |
|    | 11.2 | 2.2±2.4 | 9.5±7.9   | 9.0±9.9   | 8.1±14.2  | 6.4±15.0  |

TABLE B4. Breakdown of the percentage of total understory cover by shrubs, forbs, and graminoids by forest structural class and type in Oregon, Washington, and inland Northern California.

|       |      | Understory Cover (%) |        |       |            |
|-------|------|----------------------|--------|-------|------------|
| Class | Type | All                  | Shrubs | Forbs | Graminoids |
| 1     |      | 45±35                | 19±21  | 14±17 | 12±16      |
|       | 1.1  | 40±33                | 19±22  | 11±12 | 10±14      |
|       | 1.2  | 47±36                | 18±21  | 16±19 | 13±17      |
| 2     |      | 48±30                | 19±21  | 10±12 | 19±18      |
|       | 2.1  | 46±28                | 16±18  | 9±10  | 21±18      |
|       | 2.2  | 54±34                | 24±25  | 13±15 | 17±17      |
| 3     | 3.0  | 84±36                | 47±30  | 22±19 | 14±18      |
| 4     | 4.0  | 55±35                | 21±22  | 12±14 | 22±20      |
| 5     |      | 18±20                | 8±11   | 4±6   | 6±10       |
|       | 5.1  | 26±19                | 13±13  | 5±6   | 8±10       |
|       | 5.2  | 24±21                | 9±11   | 5±7   | 9±12       |
|       | 5.3  | 0±1                  | 0±1    | 0±0   | 0±0        |
| 6     |      | 47±31                | 21±21  | 13±14 | 12±14      |
|       | 6.1  | 47±30                | 21±22  | 13±12 | 13±14      |
|       | 6.2  | 45±38                | 19±20  | 17±20 | 9±14       |
| 7     |      | 55±34                | 31±27  | 14±15 | 10±14      |
|       | 7.1  | 57±34                | 31±27  | 14±15 | 12±15      |
|       | 7.2  | 53±30                | 31±24  | 14±15 | 8±12       |
|       | 7.3  | 55±40                | 32±28  | 14±16 | 8±14       |
| 8     |      | 83±40                | 45±31  | 29±25 | 8±15       |
|       | 8.1  | 89±40                | 48±32  | 29±26 | 12±18      |
|       | 8.2  | 68±38                | 37±26  | 26±21 | 5±11       |

|    |      |       |       |       |      |
|----|------|-------|-------|-------|------|
|    | 8.3  | 92±38 | 51±31 | 34±28 | 7±12 |
| 9  |      | 39±32 | 23±22 | 12±15 | 4±8  |
|    | 9.1  | 57±30 | 33±24 | 17±16 | 8±11 |
|    | 9.2  | 28±25 | 17±19 | 9±11  | 2±5  |
|    | 9.3  | 36±36 | 21±22 | 13±19 | 2±5  |
| 10 |      | 29±33 | 16±23 | 11±16 | 2±5  |
|    | 10.1 | 61±33 | 34±28 | 23±21 | 5±8  |
|    | 10.2 | 10±12 | 5±7   | 4±6   | 1±2  |
|    | 10.3 | 12±16 | 7±11  | 5±8   | 0±2  |
| 11 |      | 73±39 | 41±29 | 30±26 | 1±3  |
|    | 11.1 | 57±31 | 32±24 | 24±19 | 1±2  |
|    | 11.2 | 94±39 | 53±30 | 39±32 | 2±4  |
